# Supplementary material for: Physicochemical studies on local anaesthetic loaded second generation nanolipid carriers
Source: Royal Society of Chemistry journal article supplement (doi:10.1039/c4ra16434b), 2015-01-01
Supplement: c4ra16434b1.pdf [file c4ra16434b1.pdf]

**Table S 1.** Temperature for maximum heat flow ( $T_m$ ), the width at half peak height ( $\Delta T_{1/2}$ ), change in enthalpy ( $\Delta H$ ), heat capacity ( $\Delta C_p$ ) and percentage of crystallinity (C.I.) of blank as well as LIDO and PRO.HCl loaded NLC (5mM; Span 65+SLC+SA, 2:2:1 M/M/M).

| [Drug]/ mM                                                  | $T_m/ ^\circ\text{C}$ | $\Delta T_{1/2}/ ^\circ\text{C}$ | $\Delta H/\text{kcal.mol}^{-1}$ | $\Delta C_p/\text{kcal.mol}^{-1}\text{C}^{-1}$ | CI (%) |
|-------------------------------------------------------------|-----------------------|----------------------------------|---------------------------------|------------------------------------------------|--------|
| <b><i>Lidocaine loaded NLC in Tween 40</i></b>              |                       |                                  |                                 |                                                |        |
| 0.0                                                         | 35.61                 | 2.01                             | 5.83                            | 10.40                                          | 100    |
| 0.2                                                         | 35.53                 | 2.16                             | 4.77                            | 8.63                                           | 81     |
| 0.5                                                         | 34.77                 | 1.96                             | 4.89                            | 6.12                                           | 83     |
| 1.0                                                         | 35.07                 | 2.02                             | 4.57                            | 5.95                                           | 78     |
| 1.5                                                         | 35.40                 | 2.14                             | 4.00                            | 5.18                                           | 68     |
| 2.0                                                         | 34.51                 | 2.08                             | 3.27                            | 3.18                                           | 56     |
| 2.5                                                         | 34.39                 | 2.08                             | 2.91                            | 2.65                                           | 49     |
| <b><i>Lidocaine loaded NLC in Tween 60</i></b>              |                       |                                  |                                 |                                                |        |
| 0.0                                                         | 32.58                 | 3.15                             | 8.00                            | 5.85                                           | 100    |
| 0.2                                                         | 32.55                 | 3.51                             | 6.13                            | 5.18                                           | 76     |
| 0.5                                                         | 32.33                 | 3.27                             | 5.26                            | 4.95                                           | 65     |
| 1.0                                                         | 32.18                 | 2.92                             | 4.64                            | 3.78                                           | 58     |
| 1.5                                                         | 31.97                 | 2.32                             | 3.62                            | 2.58                                           | 45     |
| 2.0                                                         | 31.71                 | 2.20                             | 3.53                            | 2.38                                           | 44     |
| 2.5                                                         | 31.02                 | 2.08                             | 1.87                            | 1.23                                           | 23     |
| <b><i>Procaine hydrochloride loaded NLC in Tween 40</i></b> |                       |                                  |                                 |                                                |        |
| 0.0                                                         | 35.61                 | 2.01                             | 5.83                            | 10.40                                          | 100    |
| 0.2                                                         | 32.60                 | 2.02                             | 2.89                            | 4.36                                           | 49     |
| 0.5                                                         | 32.38                 | 2.00                             | 2.56                            | 3.76                                           | 43     |
| 1.0                                                         | 32.08                 | 2.34                             | 2.75                            | 3.28                                           | 47     |
| 1.5                                                         | 32.18                 | 2.10                             | 2.46                            | 3.12                                           | 42     |
| 2.0                                                         | 32.45                 | 2.02                             | 2.38                            | 3.01                                           | 40     |
| 2.5                                                         | 32.40                 | 2.01                             | 2.31                            | 2.83                                           | 39     |
| <b><i>Procaine hydrochloride loaded NLC in Tween 60</i></b> |                       |                                  |                                 |                                                |        |
| 0.0                                                         | 32.58                 | 3.15                             | 8.99                            | 5.85                                           | 100    |
| 0.2                                                         | 32.07                 | 4.09                             | 5.09                            | 3.79                                           | 63     |
| 0.5                                                         | 32.34                 | 3.68                             | 4.74                            | 3.79                                           | 59     |
| 1.0                                                         | 32.61                 | 3.49                             | 4.68                            | 3.74                                           | 58     |
| 1.5                                                         | 32.71                 | 3.29                             | 4.59                            | 3.72                                           | 57     |
| 2.0                                                         | 32.91                 | 3.24                             | 4.54                            | 3.58                                           | 56     |
| 2.5                                                         | 32.85                 | 3.29                             | 4.55                            | 3.40                                           | 56     |

DSC measurements were performed on day one of sample preparation.

**Table S 2.** Drug release kinetics profiles of LIDO and PRO.HCl loaded NLCs.

| Formulation | Korsemeyer-Peppas |       |       | Higuchi        |       | Hixson-Crowell |       | First order    |       |
|-------------|-------------------|-------|-------|----------------|-------|----------------|-------|----------------|-------|
|             | r <sup>2</sup>    | k     | n     | r <sup>2</sup> | k     | r <sup>2</sup> | k     | r <sup>2</sup> | k     |
| LIDO-T40    | 0.99              | 6.84  | 0.283 | 0.98           | 2.35  | 0.93           | 0.001 | 0.93           | 0.002 |
| LIDO-T60    | 0.95              | 10.25 | 0.333 | 0.91           | 4.47  | 0.87           | 0.002 | 0.90           | 0.007 |
| PRO.HCL-T40 | 0.99              | 40.03 | 0.178 | 0.75           | 15.51 | 0.76           | 0.031 | 0.93           | 0.393 |
| PRO.HCl-T60 | 0.94              | 41.93 | 0.256 | 0.86           | 0.271 | 0.90           | 0.036 | 0.92           | 0.446 |

\*r<sup>2</sup>=regression coefficient, k= release rate constant, n=diffusional exponent.

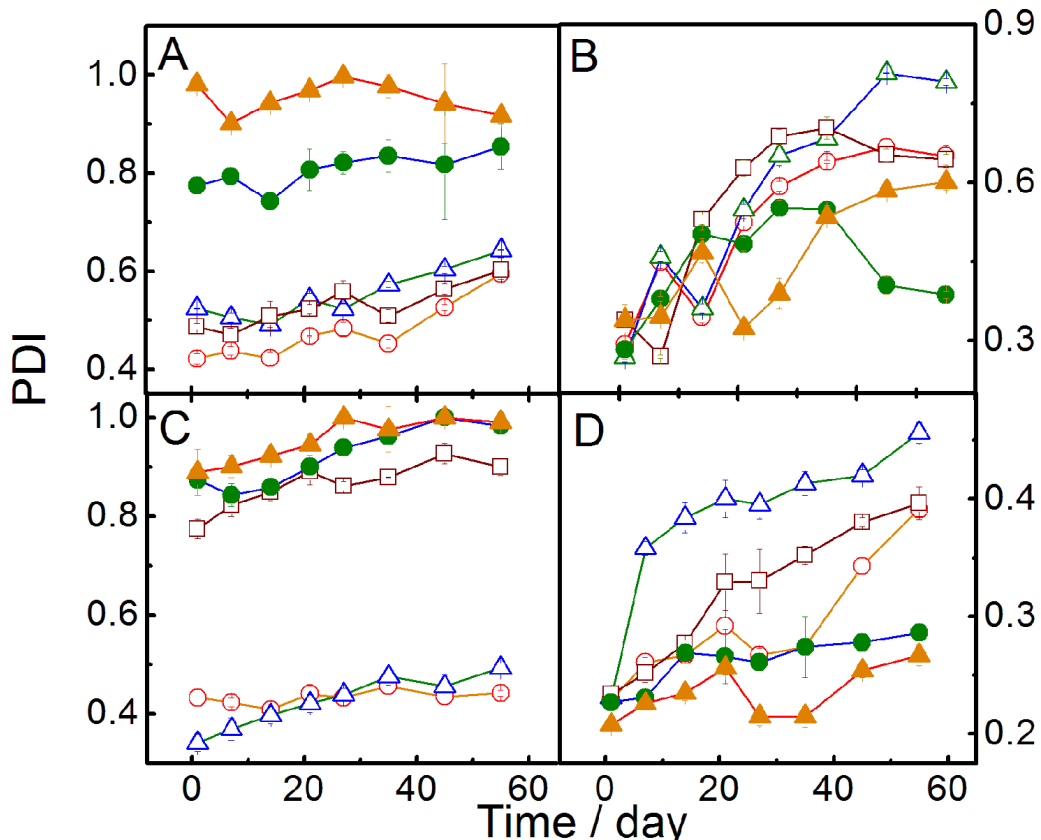

**Figure S 1.** Variation in the polydispersity index (PDI) of NLCs (Span 65 + SLC + SA, 2:2:1 M/M/M) with time in presence of varying concentration of drugs. Panel A: LIDO loaded NLC in Tween 40; panel B: PRO.HCl loaded NLC in Tween 40; panel C: LIDO loaded NLC in Tween 60 and panel D: PRO.HCl loaded NLC in Tween 60. 5 mM NLC was dispersed in 10 mM Tween in each case. Drug concentration (mM) : O, 0; Δ, 0.5; □, 1; ●, 2 and ▲, 2.5. Temp. 25 °C.

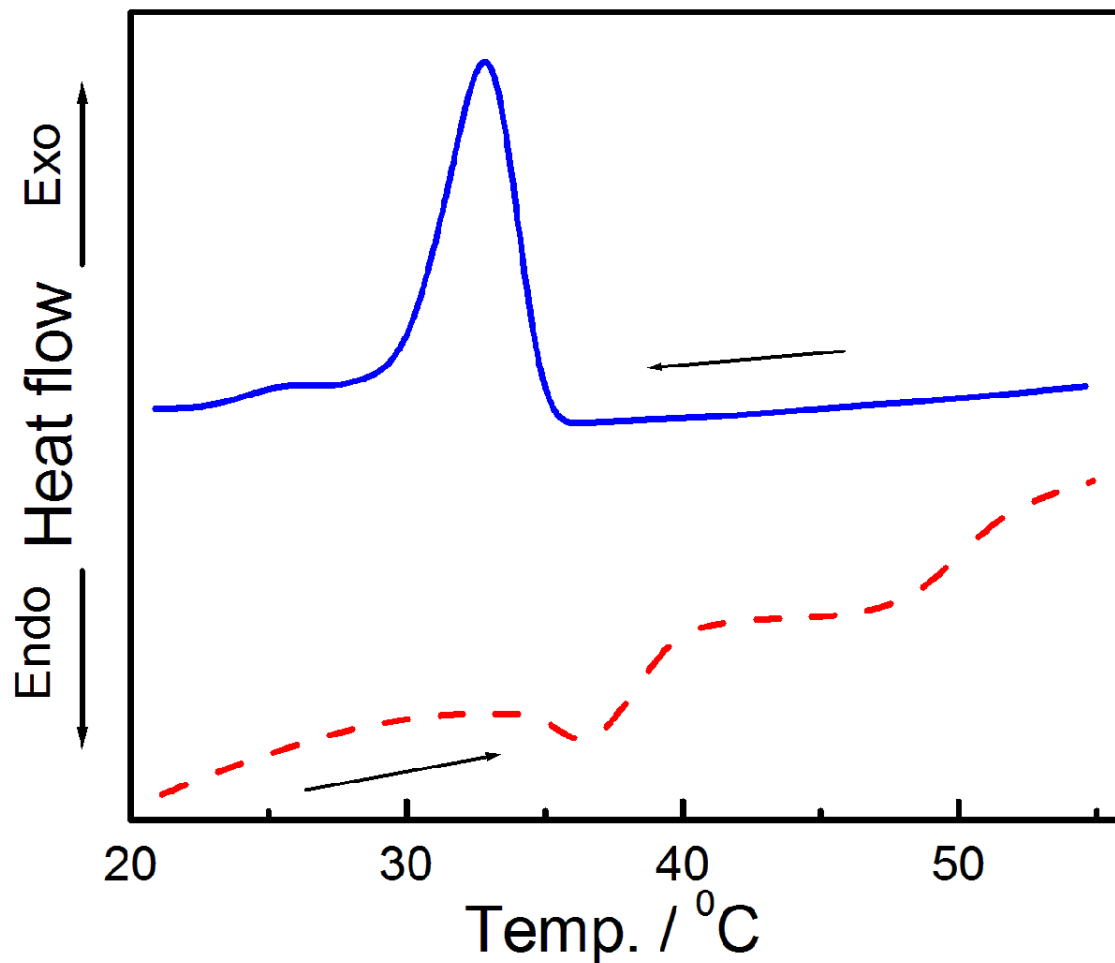

**Figure S 2.** DSC heating (---) and cooling (—) thermogram of 2.5 mM LIDO loaded NLC (5 mM, Span 65+SLC+SA, 2:2:1 M/M/M) dispersed in Tween 60 (10mM). Scan rate: 2 °C/min.

$E_T(30)$  value is defined as the molar electronic transition energy ( $E_T$ ) of dissolved probe molecule measured in kCal/mol at room temperature(25 °C) and normal pressure (1bar). It is expressed by the equation:

$$E_T(30) = 28591 / \lambda_{\max}$$

where,  $\lambda_{\max}$  is the wavelength of maximum absorption

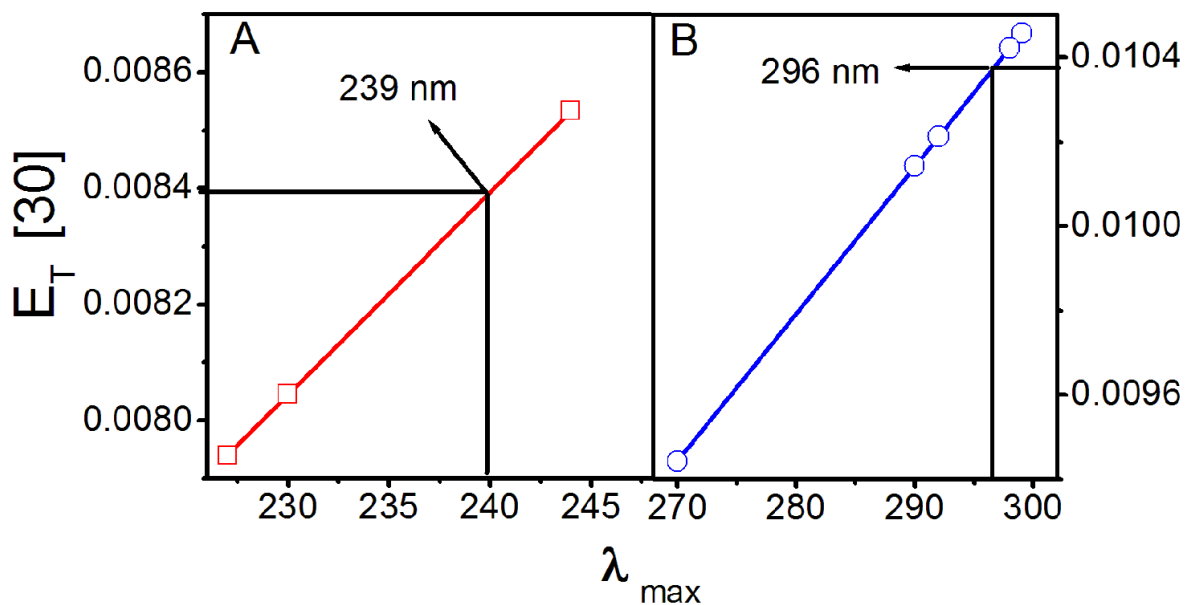

**Figure S 3.** Dependence of absorption maxima ( $\lambda_{\max}$ ) of LIDO (panel A) and PRO.HCl (panel B) on the  $E_T(30)$  scale of medium at 25 °C.
